# Supplementary material for: Serum metabolomics reveals the metabolic profile and potential biomarkers of ankylosing spondylitis
Source: Royal Society of Chemistry journal article supplement (doi:10.1039/d4mo00076e), 2024-06-24
Supplement: d4mo00076e1.pdf [file d4mo00076e1.pdf]

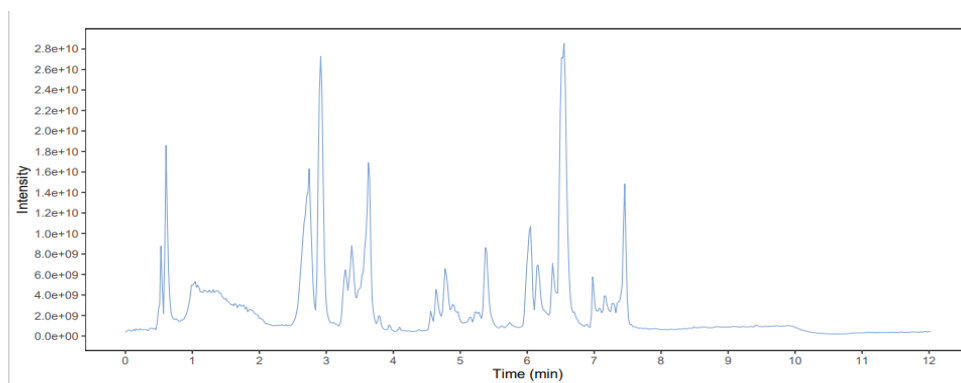

(A) Positive ion mode

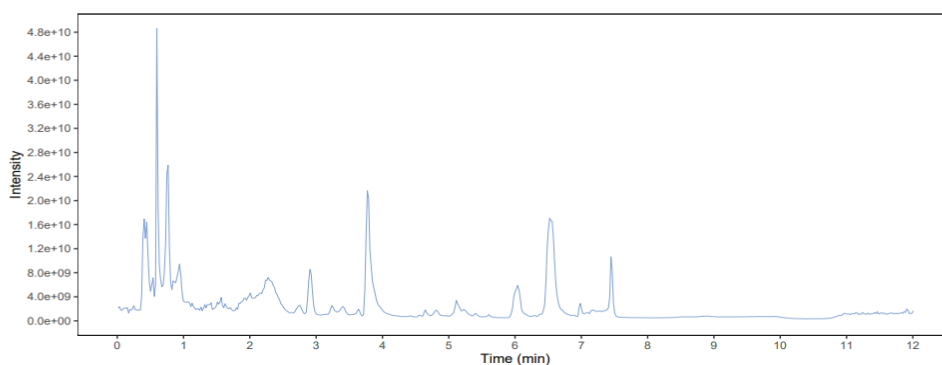

(B) Negative ion mode

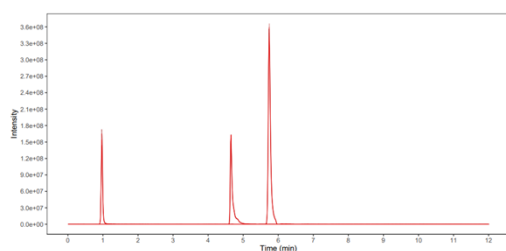

(C) Positive ion mode

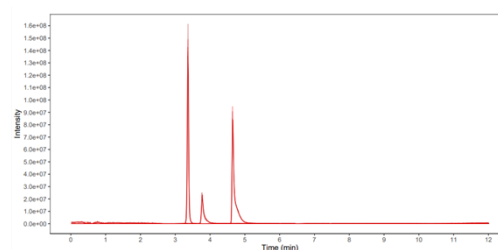

(D) Negative ion mode

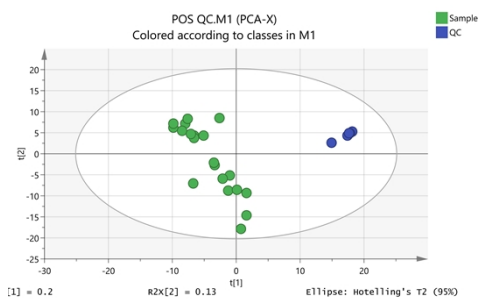

(E) Positive ion mode

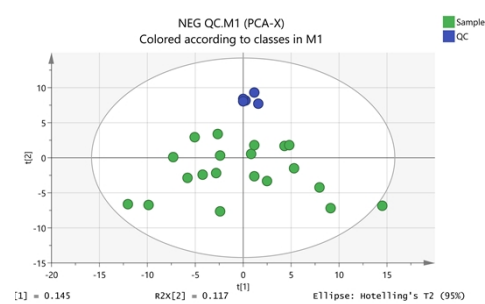

(F) Negative ion mode

**Supplementary Figure S1 Quality control diagram. A and B are TIC diagrams of QC samples; C and D are EIC diagrams of internal standard in QC sample; E and F are PCA analysis of QC samples.**
