# Supplementary material for: Serum metabolomics reveals the metabolic profile and potential biomarkers of ankylosing spondylitis
Source: Royal Society of Chemistry journal article supplement (doi:10.1039/d4mo00076e), 2024-06-24
Supplement: d4mo00076e3.pdf [file d4mo00076e3.pdf]

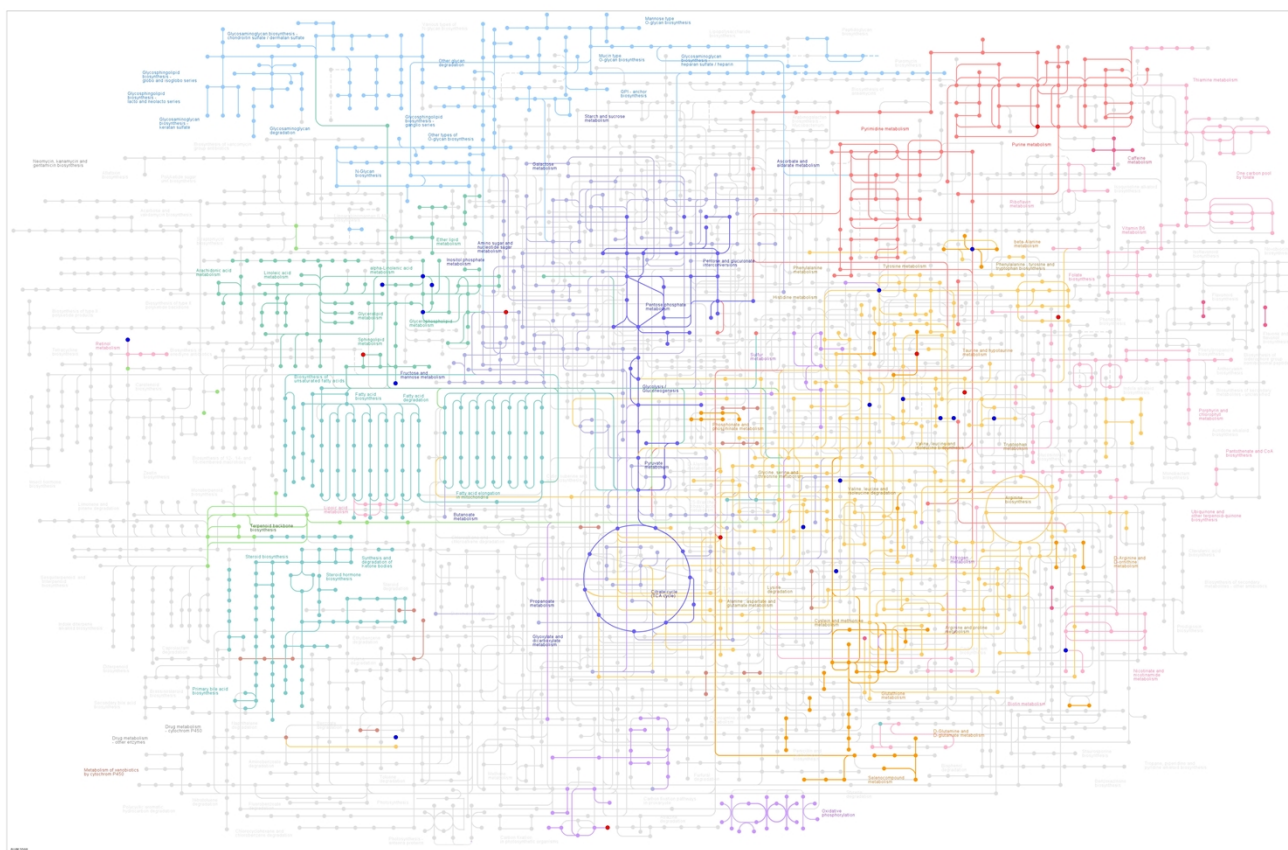

(A) Positive ion mode

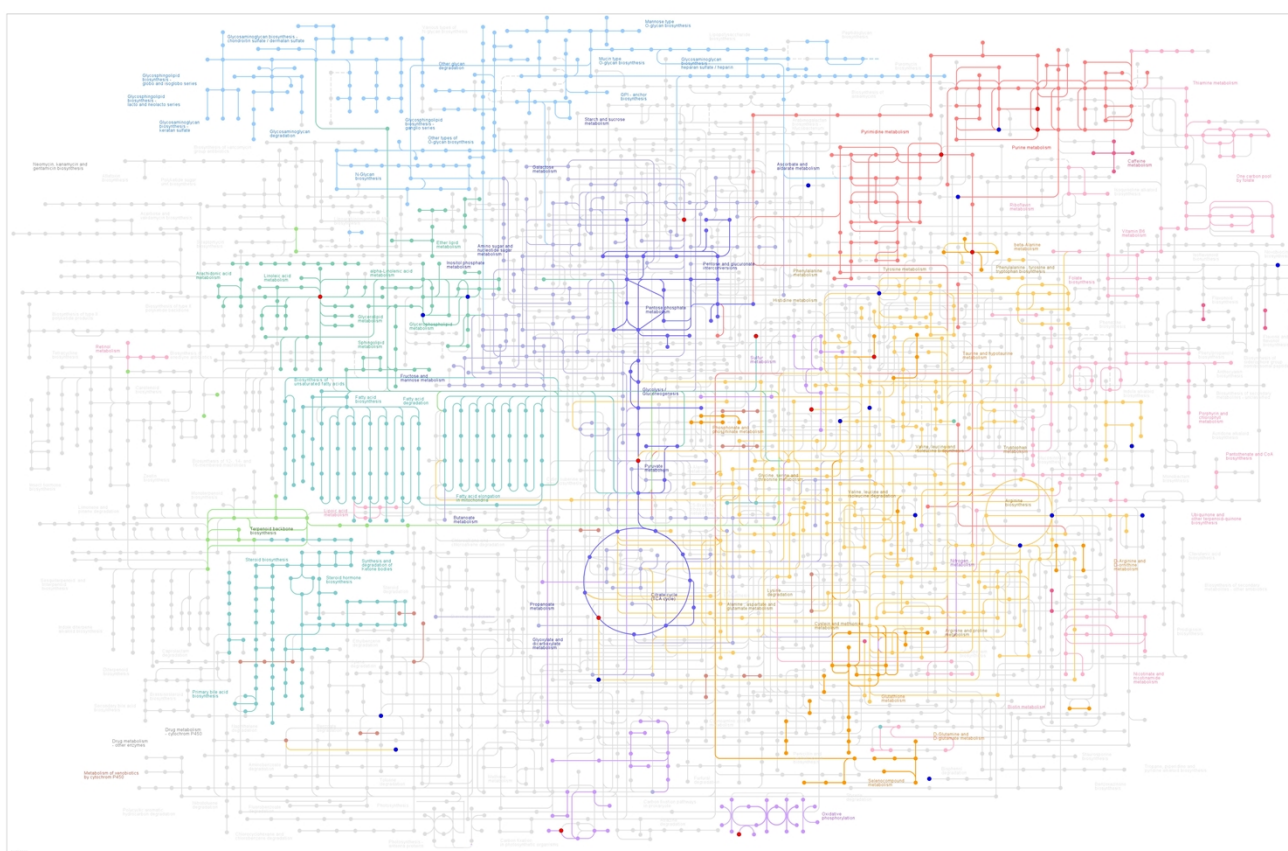

(B) Negative ion mode

**Supplementary Figure S3 Metabolic pathways with red/blue dots representing the differentially expressed compounds  
Red means up regulation, blue means down regulation**
