# Supplementary material for: Serum metabolomics reveals the metabolic profile and potential biomarkers of ankylosing spondylitis
Source: Royal Society of Chemistry journal article supplement (doi:10.1039/d4mo00076e), 2024-06-24
Supplement: d4mo00076e5.pdf [file d4mo00076e5.pdf]

| Number | Gender | Age | IgG(g/l) | IgA(g/l) | IgM(g/l) | C3(g/l) | C4(g/l) | HLA-B27 | ESR | CRP  |
|--------|--------|-----|----------|----------|----------|---------|---------|---------|-----|------|
| AS1    | Female | 16  | 12.4     | 1.74     | 0.63     | 1.08    | 0.122   | 165     | 7   | 0.75 |
| AS2    | Female | 16  | 13.7     | 1.82     | 1.72     | 1.13    | 0.144   | 164     | 17  |      |
| AS3    | Male   | 17  | 13.1     | 1.91     | 0.84     | 1.48    | 0.294   | 84      | 25  |      |
| AS4    | Male   | 17  | 18.4     | 3.95     | 0.77     | 1.48    | 0.29    | 162     | 14  | 7.97 |
| AS5    | Male   | 17  | 14.6     | 2.84     | 0.5      | 1.6     | 0.486   | 157     | 35  | 69   |
| AS6    | Female | 17  | 10.2     | 2.38     | 1.11     | 0.85    | 0.137   | 84      | 3   | 0.15 |
| AS7    | Male   | 18  | 11.6     | 2.95     | 0.56     | 1.25    | 0.206   | 161     | 23  | 25.5 |
| AS8    | Male   | 19  | 11.2     | 2.46     | 1.06     | 1.21    | 0.219   | 157     | 15  | 0.48 |
| AS9    | Male   | 19  | 12.1     | 2.88     | 0.83     | 1.33    | 0.3     | 155     | 8   | 8.75 |
| AS10   | Male   | 20  | 12.3     | 2.76     | 0.8      | 1.22    | 0.26    | 160     | 5   | 12.5 |
| AS11   | Female | 20  | 16.3     | 1.18     | 1.83     | 1.63    | 0.345   | 156     | 25  | 9.55 |
| AS12   | Male   | 23  | 9.91     | 2.53     | 0.51     | 1.62    | 0.34    | 154     | 19  | 58.7 |
| AS13   | Female | 23  | 13.4     | 2.94     | 1.64     | 1.39    | 0.239   | 170     | 6   |      |
| AS14   | Male   | 24  |          | 4.53     | 1.54     | 1.44    | 0.295   | 167     | 25  | 101  |
| AS15   | Male   | 26  | 8.83     | 1.11     | 1.25     | 1.06    | 0.214   | 167     | 14  | 0.69 |
| AS16   | Male   | 27  | 16.2     | 3.19     | 2.04     | 2.01    | 0.305   | 149     | 12  | 67.1 |
| AS17   | Female | 27  | 20.1     | 1.74     | 1.27     | 1.21    | 0.227   | 85      | 11  | 1.4  |
| AS18   | Male   | 28  | 11.7     | 3.16     | 0.67     | 1.29    | 0.235   | 149     |     |      |
| AS19   | Female | 29  | 14.4     | 2.05     | 1.53     | 1.54    | 0.233   | 169     | 23  | 26.9 |
| AS20   | Male   | 30  | 12.4     | 1.61     | 0.96     | 1.06    | 0.247   | 166     | 11  | 2.33 |
| AS21   | Male   | 30  | 12.2     | 3.14     | 1.28     | 1.09    | 0.271   | 164     |     | 2.71 |
| AS22   | Male   | 30  | 12.9     | 3.51     | 0.82     | 0.97    | 0.212   | 159     | 2   |      |
| AS23   | Female | 30  | 11.4     | 1.82     | 1.09     | 0.85    | 0.204   | 93      | 6   | 0.16 |
| AS24   | Male   | 31  | 14.2     | 2.39     | 1.14     | 1.54    | 0.281   | 162     | 116 | 160  |
| AS25   | Female | 31  | 12.6     | 2.62     | 1.11     | 0.89    | 0.18    | 160     | 12  | 1.26 |
| AS26   | Male   | 32  | 8.86     | 1.3      | 1.28     | 1.3     | 0.282   | 169     | 5   | 10.2 |
| AS27   | Male   | 33  | 14.7     | 2.81     | 1.08     | 1.59    | 0.265   | 164     | 2   | 39   |
| AS28   | Male   | 33  | 14.7     | 2.52     | 1.55     | 1.32    | 0.273   | 161     | 15  | 1.71 |
| AS29   | Female | 33  | 16.7     | 1.81     | 1.67     | 1.54    | 0.352   | 164     | 33  | 10.5 |
| AS30   | Female | 34  | 11.8     | 2.79     | 0.84     | 0.97    | 0.188   | 156     |     | 0.29 |
| AS31   | Female | 35  | 16.3     | 1.64     | 1.54     | 1.22    | 0.27    | 166     | 20  |      |
| AS32   | Male   | 36  | 23.4     | 3.18     | 1.46     | 1.47    | 0.19    | 171     | 70  |      |
| AS33   | Male   | 36  | 16.3     | 2.64     | 1.62     | 1.04    | 0.226   | 155     |     |      |
| AS34   | Female | 36  | 12.1     | 1.11     | 0.77     | 1.12    | 0.253   | 159     | 8   | 0.49 |
| AS35   | Female | 37  | 15.2     | 2.73     | 2.9      | 1.33    | 0.291   | 161     | 58  | 11.8 |
| AS36   | Male   | 38  | 17.4     | 6.09     | 1.69     | 1.49    | 0.275   | 117     | 44  | 40.3 |
| AS37   | Female | 38  | 13.4     | 1.67     | 2.21     | 1.57    | 0.402   | 164     | 20  | 8.04 |
| AS38   | Male   | 39  | 8.87     | 2.55     | 0.63     | 0.97    | 0.208   | 94      | 2   | 0.16 |
| AS39   | Male   | 40  | 12.7     | 2.3      | 0.92     | 1.26    | 0.191   | 164     | 11  | 10.4 |
| AS40   | Female | 41  | 12.2     | 2.32     | 1.47     | 1.17    | 0.26    | 162     | 35  | 43.3 |
| AS41   | Male   | 42  | 14.8     | 3.02     | 1.89     | 1.4     | 0.329   | 170     | 14  | 31.9 |
| AS42   | Male   | 42  | 21.2     | 4.25     | 0.96     | 1.58    | 0.302   | 164     | 80  | 63   |
| AS43   | Male   | 42  | 15.6     | 4.39     | 1.28     | 1.73    | 0.377   | 155     |     |      |
| AS44   | Male   | 42  | 12.3     | 2.75     | 0.61     | 1.27    | 0.255   | 153     | 6   | 36   |
| AS45   | Male   | 43  | 12       | 4.79     | 0.93     | 1.04    | 0.18    | 175     | 10  | 1.73 |
| AS46   | Male   | 43  | 13.1     | 2.92     | 1.02     | 1.14    | 0.263   | 167     | 2   |      |
| AS47   | Male   | 43  | 11       | 4.17     | 1.16     | 1.41    | 0.183   | 160     | 23  |      |
| AS48   | Female | 43  | 11.9     | 1.97     | 0.29     | 0.87    | 0.319   | 159     | 3   | 0.43 |
| AS49   | Female | 43  | 13.3     | 2.84     | 1.29     | 1.12    | 0.325   | 152     | 30  | 12.4 |
| AS50   | Female | 45  | 15.7     | 2.52     | 2.27     | 1.21    | 0.248   | 163     | 33  | 0.9  |
| AS51   | Male   | 46  | 16.1     | 2.21     | 0.81     | 1.16    | 0.343   | 170     | 20  | 7.83 |
| AS52   | Male   | 47  | 12.8     | 7.6      | 0.66     | 1.29    | 0.402   | 165     | 55  | 28.8 |
| AS53   | Female | 47  | 16.1     | 3.35     | 0.55     | 0.55    | 0.04    | 164     | 14  | 0.16 |
| AS54   | Male   | 48  | 13       | 2.6      | 1.04     | 1.6     | 0.435   | 164     |     | 30.1 |
| AS55   | Female | 48  | 15.7     | 3.49     | 1.45     | 1.32    | 0.277   | 83      | 32  |      |
| AS56   | Female | 48  | 11.8     | 2.03     | 1.27     | 0.98    | 0.195   | 148     | 6   | 0.21 |
| AS57   | Male   | 49  | 13.3     | 2.51     | 0.56     | 1.01    | 0.327   | 174     |     |      |

|         |        |       |       |      |      |      |       |        |       |       |
|---------|--------|-------|-------|------|------|------|-------|--------|-------|-------|
| AS58    | Female | 49    | 12.9  | 2.9  | 1.79 | 1.46 | 0.22  | 111    |       |       |
| AS59    | Male   | 50    | 13.5  | 5.21 | 1.02 | 1.61 | 0.444 | 94     | 26    | 46.1  |
| AS60    | Female | 51    | 16.8  | 3.59 | 2.26 | 1.39 | 0.493 | 162    | 61    | 25.3  |
| AS61    | Female | 57    | 14    | 4.88 | 0.78 | 1.52 | 0.302 | 168    | 31    | 21.2  |
| AS62    | Male   | 60    | 11.6  | 2.92 | 2.82 | 1.3  | 0.184 | 140    | 61    | 7.89  |
| AS63    | Male   | 64    | 13.6  | 4.36 | 1.1  | 1.48 | 0.557 | 172    | 82    | 54.1  |
| AS64    | Male   | 65    | 12.4  | 2.12 | 1.69 | 1.17 | 0.231 | 178    | 13    | 0.93  |
| AS65    | Female | 71    | 14.1  | 1.74 | 0.77 | 1    | 0.17  | 177    | 5     | 0.22  |
| AS66    | Male   | 74    | 12.4  | 3.67 | 2.83 | 1.02 | 0.184 | 172    | 13    | 59.3  |
| AS67    | Male   | 81    | 8.59  | 1.34 | 1    | 0.97 | 0.165 | 166    | 20    |       |
| Average |        | 37.45 | 13.64 | 2.85 | 1.24 | 1.27 | 0.27  | 153.31 | 23.68 | 22.34 |
| SD      |        | 14.57 | 2.77  | 1.18 | 0.58 | 0.26 | 0.09  | 24.95  | 23.05 | 30.63 |
