# Supplementary material for: Serum metabolomics reveals the metabolic profile and potential biomarkers of ankylosing spondylitis
Source: Royal Society of Chemistry journal article supplement (doi:10.1039/d4mo00076e), 2024-06-24
Supplement: d4mo00076e6.pdf [file d4mo00076e6.pdf]

| Number | Gender | Age | white blood cell (*10 <sup>9</sup> /L) | Relative value of neutrophils(%) | Leukocyte esterase | proteinuria | nitrite |
|--------|--------|-----|----------------------------------------|----------------------------------|--------------------|-------------|---------|
| HC1    | Male   | 13  | 5.32                                   | 62                               | -                  | -           | -       |
| HC2    | Male   | 14  | 9                                      | 73.2                             | -                  | -           | -       |
| HC3    | Male   | 14  | 6.77                                   | 62.1                             | -                  | -           | -       |
| HC4    | Female | 15  | 7.79                                   | 57.4                             | -                  | -           | -       |
| HC5    | Female | 16  | 8.63                                   | 59.9                             | -                  | -           | -       |
| HC6    | Male   | 17  | 4.4                                    | 57.2                             | -                  | -           | -       |
| HC7    | Male   | 18  | 6.47                                   | 59.4                             | -                  | -           | -       |
| HC8    | Male   | 18  | 4.8                                    | 49.1                             | -                  | -           | -       |
| HC9    | Female | 19  | 7.06                                   | 50.9                             | -                  | -           | -       |
| HC10   | Male   | 23  | 7.52                                   | 53.5                             | -                  | -           | -       |
| HC11   | Male   | 23  | 9.09                                   | 46                               | -                  | -           | -       |
| HC12   | Male   | 24  | 6.27                                   | 44.2                             | -                  | -           | -       |
| HC13   | Male   | 25  | 7.79                                   | 57.4                             | -                  | -           | -       |
| HC14   | Male   | 25  | 9.71                                   | 66.5                             | -                  | -           | -       |
| HC15   | Female | 26  | 7.98                                   | 63.1                             | -                  | -           | -       |
| HC16   | Female | 26  | 7.52                                   | 64.7                             | -                  | -           | -       |
| HC17   | Female | 28  | 10.06                                  | 53.8                             | -                  | -           | -       |
| HC18   | Female | 28  | 7.82                                   | 54.7                             | -                  | -           | -       |
| HC19   | Male   | 29  | 5.23                                   | 61.3                             | -                  | -           | -       |
| HC20   | Female | 30  | 6.84                                   | 49.9                             | -                  | -           | -       |
| HC21   | Male   | 31  | 8.76                                   | 51.1                             | -                  | -           | -       |
| HC22   | Male   | 32  | 6.75                                   | 64.9                             | -                  | -           | -       |
| HC23   | Male   | 33  | 5.75                                   | 43.5                             | -                  | -           | -       |
| HC24   | Female | 34  | 4.07                                   | 49.2                             | -                  | -           | -       |
| HC25   | Male   | 34  | 4.92                                   | 59.3                             | -                  | -           | -       |
| HC26   | Female | 35  | 5.66                                   | 55.3                             | -                  | -           | -       |
| HC27   | Male   | 35  | 6.93                                   | 51.9                             | -                  | -           | -       |
| HC28   | Female | 36  | 6.09                                   | 60.6                             | -                  | -           | -       |
| HC29   | Male   | 36  | 6.98                                   | 58.9                             | -                  | -           | -       |
| HC30   | Male   | 36  | 7.8                                    | 59.5                             | -                  | -           | -       |
| HC31   | Female | 37  | 8.99                                   | 58.7                             | -                  | -           | -       |
| HC32   | Female | 38  | 5.41                                   | 62.6                             | -                  | -           | -       |
| HC33   | Male   | 38  | 6.35                                   | 51.9                             | -                  | -           | -       |
| HC34   | Male   | 38  | 9.81                                   | 53.8                             | -                  | -           | -       |
| HC35   | Male   | 38  | 5.22                                   | 53                               | -                  | -           | -       |
| HC36   | Female | 39  | 5.62                                   | 57.6                             | -                  | -           | -       |
| HC37   | Male   | 39  | 5.9                                    | 57.3                             | -                  | -           | -       |
| HC38   | Female | 39  | 6.09                                   | 64.4                             | -                  | -           | -       |
| HC39   | Female | 40  | 4.43                                   | 48.3                             | -                  | -           | -       |
| HC40   | Male   | 40  | 5.56                                   | 57.5                             | -                  | -           | -       |
| HC41   | Male   | 40  | 5.87                                   | 52.8                             | -                  | -           | -       |
| HC42   | Female | 40  | 6.1                                    | 62.5                             | -                  | -           | -       |
| HC43   | Male   | 41  | 6.2                                    | 66.1                             | -                  | -           | -       |
| HC44   | Male   | 42  | 9.03                                   | 47.5                             | -                  | -           | -       |
| HC45   | Female | 43  | 4.2                                    | 57.9                             | -                  | -           | -       |
| HC46   | Male   | 43  | 8.66                                   | 64                               | -                  | -           | -       |
| HC47   | Male   | 43  | 4.08                                   | 48                               | -                  | -           | -       |
| HC48   | Male   | 44  | 6.67                                   | 52.4                             | -                  | -           | -       |
| HC49   | Male   | 45  | 8.36                                   | 53.4                             | -                  | -           | -       |
| HC50   | Male   | 45  | 7.49                                   | 56                               | -                  | -           | -       |
| HC51   | Male   | 47  | 5.81                                   | 40.6                             | -                  | -           | -       |
| HC52   | Female | 47  | 5.37                                   | 57.9                             | -                  | -           | -       |
| HC53   | Male   | 47  | 7.56                                   | 48.1                             | -                  | -           | -       |
| HC54   | Female | 47  | 7.79                                   | 55                               | -                  | -           | -       |
| HC55   | Female | 47  | 5.8                                    | 65.3                             | -                  | -           | -       |
| HC56   | Male   | 48  | 10.64                                  | 57.8                             | -                  | -           | -       |
| HC57   | Female | 49  | 6.04                                   | 50                               | -                  | -           | -       |

|         |        |       |      |       |   |   |   |
|---------|--------|-------|------|-------|---|---|---|
| HC58    | Female | 49    | 4.39 | 51    | - | - | - |
| HC59    | Male   | 53    | 3.47 | 57    | - | - | - |
| HC60    | Male   | 53    | 4.94 | 56.7  | - | - | - |
| HC61    | Female | 54    | 4    | 53.7  | - | - | - |
| HC62    | Female | 54    | 4.64 | 45.1  | - | - | - |
| HC63    | Male   | 55    | 5.55 | 58.4  | - | - | - |
| HC64    | Male   | 56    | 4.84 | 50    | - | - | - |
| HC65    | Male   | 56    | 5.33 | 57    | - | - | - |
| HC66    | Male   | 58    | 4.66 | 42    | - | - | - |
| HC67    | Female | 64    | 7.84 | 43.4  | - | - | - |
| Average |        | 36.85 | 6.54 | 55.45 |   |   |   |
| SD      |        | 12.35 | 1.70 | 6.69  |   |   |   |
