# Supplementary material for: Serum metabolomics reveals the metabolic profile and potential biomarkers of ankylosing spondylitis
Source: Royal Society of Chemistry journal article supplement (doi:10.1039/d4mo00076e), 2024-06-24
Supplement: d4mo00076e7.pdf [file d4mo00076e7.pdf]

| ID | Name                                                                               | MS/MS score | rt      | mz      | Compounds category                      | type    | MEAN A <sup>s</sup> | MEAN HC | VIP     | P-VALUE |
|----|------------------------------------------------------------------------------------|-------------|---------|---------|-----------------------------------------|---------|---------------------|---------|---------|---------|
| 1  | Beta-Aminopropionitrile                                                            | 1           | 351.78  | 71.0611 | Organic nitrogen compounds              | forward | 1.4424              | 0.9723  | 2.06376 | 0.00144 |
| 2  | Choline                                                                            | 0.999999    | 217.348 | 104.107 | Organic nitrogen compounds              | forward | 0.12754             | 0.14154 | 1.43861 | 0.03382 |
| 3  | 1-Methylnicotinamide                                                               | 0.999821231 | 336.8   | 137.071 | Organoheterocyclic compounds            | forward | 0.07929             | 0.15863 | 1.59239 | 0.01472 |
| 4  | Hypoxanthine                                                                       | 0.999624769 | 193.335 | 137.046 | Organoheterocyclic compounds            | forward | 2.35096             | 0.34878 | 2.64121 | 8.9E-05 |
| 5  | L-Carnitine                                                                        | 0.999567    | 369.135 | 162.113 | Organic nitrogen compounds              | forward | 14.629              | 18.4356 | 1.71676 | 0.00525 |
| 6  | threo-Syringoylglycerol                                                            | 0.999247462 | 257.891 | 245.1   | Benzenoids                              | forward | 0.01406             | 0.00176 | 2.58647 | 0.00126 |
| 7  | Quinoline                                                                          | 0.998993846 | 45.5639 | 130.065 | Organoheterocyclic compounds            | forward | 0.02531             | 0.01262 | 1.32792 | 0.04664 |
| 8  | Arabinosylhypoxanthine                                                             | 0.997651615 | 228.305 | 269.088 | Nucleosides, nucleotides, and analogues | forward | 0.00906             | 0.00142 | 2.22104 | 0.04224 |
| 9  | L-Gulose                                                                           | 0.996564615 | 290.868 | 203.053 | Organic oxygen compounds                | forward | 0.0026              | 0.00667 | 1.69008 | 0.00724 |
| 10 | 1,7-Tetrahydro-6-hydroxy-2,3,5-trimethylfuro[2,3-d]-1,3-dioxole-2,5-dy[8a-c]necane | 0.994454385 | 237.983 | 259.115 | Organoheterocyclic compounds            | forward | 0.00417             | 0.00089 | 2.34025 | 0.00241 |
| 11 | 4-Hydroxybenzaldehyde                                                              | 0.991523308 | 317.12  | 123.044 | Organic oxygen compounds                | forward | 0.06102             | 0.09293 | 1.87187 | 0.00484 |
| 12 | Pipecolic acid                                                                     | 0.991409231 | 547.749 | 130.087 | Organic acids and derivatives           | forward | 0.19128             | 0.32883 | 1.68049 | 0.0079  |
| 13 | L-Threonine                                                                        | 0.988967769 | 365.491 | 120.066 | Organic acids and derivatives           | forward | 0.07988             | 0.11511 | 1.4007  | 0.04897 |
| 14 | Tyrosyl-Histidine                                                                  | 0.988944846 | 270.858 | 319.136 | Organic acids and derivatives           | forward | 0.00015             | 5.4E-05 | 1.86921 | 0.00738 |
| 15 | beta-Alanine                                                                       | 0.988338154 | 359.243 | 90.0555 | Organic acids and derivatives           | forward | 0.08425             | 0.11432 | 1.63753 | 0.03422 |
| 16 | Imidazoleacetic acid                                                               | 0.985918462 | 280.099 | 127.051 | Organoheterocyclic compounds            | forward | 3.21434             | 2.67975 | 1.4131  | 0.0308  |
| 17 | m-Aminobenzoic acid                                                                | 0.983200385 | 301.507 | 138.055 | Benzenoids                              | forward | 0.12538             | 0.29857 | 1.29805 | 0.01585 |
| 18 | Pyro-L-glutaminyL-L-glutamine                                                      | 0.979788462 | 180.436 | 258.109 | Organic acids and derivatives           | forward | 0.00074             | 0.00187 | 1.60132 | 7.4E-06 |
| 19 | LysoPE(16:0/0:0)                                                                   | 0.973165846 | 223.102 | 454.293 | Lipids and lipid-like molecules         | forward | 0.0717              | 0.09964 | 1.52695 | 0.01824 |
| 20 | Phytosphingosine                                                                   | 0.969872231 | 63.5184 | 318.3   | Organic nitrogen compounds              | forward | 0.00518             | 0.00119 | 2.78796 | 6E-06   |
| 21 | Indoleacetaldehyde                                                                 | 0.966382231 | 263.398 | 160.076 | Organoheterocyclic compounds            | forward | 0.0024              | 0.04158 | 2.24203 | 0.00232 |
| 22 | 5-Aminoimidazole                                                                   | 0.965251231 | 240.439 | 84.0563 | Organoheterocyclic compounds            | forward | 0.01137             | 0.00419 | 1.67591 | 0.03215 |
| 23 | Thiiranebutanenitrile                                                              | 0.965102385 | 280.127 | 128.054 | Organoheterocyclic compounds            | forward | 0.16275             | 0.13081 | 1.52785 | 0.02139 |
| 24 | N6-Methyladenosine                                                                 | 0.954326    | 305.698 | 282.12  | Nucleosides, nucleotides, and analogues | forward | 0.05724             | 0.07952 | 2.20168 | 0.00071 |
| 25 | 3-Amino-2-piperidone                                                               | 0.953320462 | 210.467 | 115.087 | Organic acids and derivatives           | forward | 0.03453             | 0.01987 | 1.90611 | 0.00773 |
| 26 | 1H-Indole-3-carboxaldehyde                                                         | 0.949462231 | 277.785 | 146.06  | Organoheterocyclic compounds            | forward | 0.06164             | 0.09914 | 2.03962 | 0.00041 |
| 27 | Thymine                                                                            | 0.936329692 | 291.645 | 127.051 | Organoheterocyclic compounds            | forward | 0.18706             | 0.09721 | 1.52889 | 0.02732 |
| 28 | Dimethylethanolamine                                                               | 0.912661154 | 167.922 | 90.0918 | Organonitrogen compounds                | forward | 0.0055              | 0.00825 | 1.80153 | 0.00363 |
| 29 | L-Aspartic acid                                                                    | 0.91108     | 408.628 | 134.045 | Organic acids and derivatives           | forward | 0.00968             | 0.00551 | 1.46795 | 0.03448 |
| 30 | L-Kynurenine                                                                       | 0.901483846 | 279.162 | 209.092 | Organic oxygen compounds                | forward | 0.01593             | 0.03026 | 1.98399 | 0.00498 |
| 31 | Octadecylamine                                                                     | 0.899452769 | 154.179 | 270.316 | Organonitrogen compounds                | forward | 0.00087             | 4.8E-05 | 2.67636 | 5.1E-06 |
| 32 | (±)-Tryptophan                                                                     | 0.895806923 | 277.994 | 205.098 | Organonitrogen compounds                | forward | 0.74067             | 1.09996 | 1.89688 | 0.00134 |
| 33 | Trimethylaminoacetone                                                              | 0.891986923 | 228.832 | 116.107 | Organic oxygen compounds                | forward | 0.01713             | 0.02806 | 1.44917 | 0.0105  |
| 34 | 2-(3,4-Dihydroxybenzoyloxy)-4,6-dihydroxybenzoate                                  | 0.891442231 | 228.658 | 307.044 | Phenylpropanoids and polyketides        | forward | 0.02007             | 0.00393 | 2.21352 | 0.01981 |
| 35 | Theaspiron A                                                                       | 0.886202    | 447.148 | 209.154 | Organic oxygen compounds                | forward | 0.00449             | 0.0057  | 1.53417 | 0.04447 |
| 36 | L-Tyrosine                                                                         | 0.884292846 | 317.12  | 182.082 | Organic acids and derivatives           | forward | 0.57266             | 0.84367 | 1.86044 | 0.00491 |
| 37 | N-Nitroso-pyrrolidine                                                              | 0.876407692 | 329.986 | 101.071 | Organoheterocyclic compounds            | forward | 0.02752             | 0.01624 | 1.99119 | 0.00138 |
| 38 | Triethanolamine                                                                    | 0.871208308 | 153.077 | 150.113 | Organonitrogen compounds                | forward | 0.01459             | 0.00608 | 2.00065 | 0.0257  |
| 39 | Alitame                                                                            | 0.849953538 | 235.18  | 332.164 | Organic acids and derivatives           | forward | 0.0017              | 0.00389 | 1.57381 | 0.0057  |
| 40 | Homoarecoline                                                                      | 0.848264    | 356.211 | 170.118 | Alkaloids and derivatives               | forward | 0.01583             | 0.03703 | 1.88682 | 0.00343 |
| 41 | 1-(2,3-Dihydro-6,7-dimethyl-1H-pyrrolizin-5-yl)-2-hydroxy-1-propanone              | 0.841590769 | 211.723 | 208.133 | Organoheterocyclic compounds            | forward | 0.02674             | 0.10913 | 1.58262 | 0.02799 |
| 42 | Urocanic acid                                                                      | 0.840385769 | 298.744 | 139.05  | Organic compounds                       | forward | 0.01858             | 0.03054 | 1.56411 | 0.02302 |
| 43 | D-1-Amino-2-pyrrolidinecarboxylic acid                                             | 0.824398692 | 225.494 | 131.082 | Organic acids and derivatives           | forward | 0.00639             | 0.0044  | 1.35088 | 0.01728 |
| 44 | Pivaloylcarnitine                                                                  | 0.808512692 | 260.799 | 246.17  | Lipids and lipid-like molecules         | forward | 0.14294             | 0.22664 | 1.63132 | 0.01226 |
| 45 | SM(d18:1/16:0)                                                                     | 0.801787615 | 187.507 | 703.574 | Lipids and lipid-like molecules         | forward | 0.71828             | 0.84596 | 1.62377 | 0.01864 |
| 46 | Prolylphenylalanine                                                                | 0.786234769 | 288.012 | 263.139 | Organic acids and derivatives           | forward | 0.00122             | 0.00265 | 1.16945 | 0.00959 |
| 47 | Carzerenone                                                                        | 0.779733077 | 22.7282 | 231.135 | Lipids and lipid-like molecules         | forward | 0.00498             | 0.00395 | 1.45979 | 0.02558 |
| 48 | PC(16:0/16:0)                                                                      | 0.758186    | 38.7603 | 734.57  | Lipids and lipid-like molecules         | forward | 0.11514             | 0.14272 | 1.63388 | 0.01331 |
| 49 | 2-Benzofurancarboxaldehyde                                                         | 0.752976846 | 317.099 | 147.044 | Organoheterocyclic compounds            | forward | 0.01523             | 0.03087 | 1.68325 | 0.00175 |
| 50 | PC(20:3(8Z,11Z,14Z)/20:1(11Z))                                                     | 0.741123846 | 156.98  | 838.63  | Lipids and lipid-like molecules         | forward | 0.07993             | 0.12476 | 1.87124 | 0.00126 |
| 51 | 2,4-Diamino-6-nitrotoluene                                                         | 0.739568769 | 339.372 | 168.077 | Benzenoids                              | forward | 0.0687              | 0.13268 | 1.8995  | 0.00931 |
| 52 | 2-Phenylacetamide                                                                  | 0.733600538 | 317.104 | 136.076 | Benzenoids                              | forward | 0.14883             | 0.22226 | 1.82253 | 0.00632 |
| 53 | 2,2,4,4,6,6-Hexamethyl-1,3,5-trithiane                                             | 0.730673077 | 30.7564 | 223.064 | Organosulfur compounds                  | forward | 0.01732             | 0.011   | 2.00349 | 0.00123 |
| 54 | 9-HOTE                                                                             | 0.724853154 | 50.108  | 295.227 | Lipids and lipid-like molecules         | forward | 0.00983             | 0.00544 | 1.49347 | 0.03621 |
| 55 | Betaine aldehyde                                                                   | 0.721584923 | 369.702 | 102.092 | Organic nitrogen compounds              | forward | 0.04991             | 0.06395 | 1.59898 | 0.00821 |
| 56 | PC(20:4(8Z,11Z,14Z,17Z)/P-18:0)                                                    | 0.717308    | 59.3776 | 794.604 | Lipids and lipid-like molecules         | forward | 0.30535             | 0.39677 | 1.34359 | 0.04901 |
| 57 | SM(d16:1/24:1(15Z))                                                                | 0.715384462 | 197.037 | 785.653 | Lipids and lipid-like molecules         | forward | 1.02299             | 1.26    | 1.84437 | 0.00356 |
| 58 | 2-(4-(5,8,11,14,17-Eicosapentaenoyl)-1-O-hexadecylglycero-3-phosphocholine         | 0.711754692 | 36.5158 | 766.574 | Lipids and lipid-like molecules         | forward | 0.08605             | 0.12184 | 1.25514 | 0.03704 |
| 59 | DG(18:3(9Z,12Z,15Z)/20:3(5Z,8Z,11Z)/0:0)                                           | 0.698968692 | 30.7669 | 641.514 | Lipids and lipid-like molecules         | forward | 0.00501             | 0.00712 | 1.60767 | 0.01676 |
| 60 | trans-Hexadec-2-enoyl carnitine                                                    | 0.698871692 | 198.998 | 398.327 | Lipids and lipid-like molecules         | forward | 0.06799             | 0.04401 | 1.5652  | 0.02276 |
| 61 | Phenylalanyl-Tryptophan                                                            | 0.698820462 | 189.667 | 352.166 | Organic acids and derivatives           | forward | 0.0009              | 0.00229 | 2.4381  | 4.5E-06 |
| 62 | L-Cyclo(alanylglycyl)                                                              | 0.692914154 | 339.504 | 129.066 | Organoheterocyclic compounds            | forward | 0.12565             | 0.16873 | 1.69038 | 0.0143  |
| 63 | PC(20:5(5Z,8Z,11Z,14Z,17Z)/P-18:0)                                                 | 0.691202385 | 154.242 | 792.591 | Lipids and lipid-like molecules         | forward | 0.21478             | 0.30071 | 1.77207 | 0.00523 |
| 64 | PC(22:5(4Z,7Z,10Z,13Z,16Z)/20:5(5Z,8Z,11Z,14Z,17Z))                                | 0.686595154 | 153.06  | 854.569 | Lipids and lipid-like molecules         | forward | 0.00488             | 0.00938 | 1.55578 | 0.00286 |
| 65 | DG(14:0/22:4(7Z,10Z,13Z,16Z)/0:0)                                                  | 0.683213538 | 30.7838 | 617.514 | Lipids and lipid-like molecules         | forward | 0.01741             | 0.02925 | 1.72943 | 0.02037 |
| 66 | PC(20:2(11Z,14Z)/20:4(5Z,8Z,11Z,14Z))                                              | 0.675367308 | 36.4977 | 834.601 | Lipids and lipid-like molecules         | forward | 0.17347             | 0.23098 | 1.46594 | 0.04334 |
| 67 | N-Acetylhistidine                                                                  | 0.673956385 | 406.178 | 198.085 | Organic acids and derivatives           | forward | 0.0599              | 0.18219 | 1.91297 | 0.01726 |
| 68 | PC(22:4(7Z,10Z,13Z,16Z)/16:0)                                                      | 0.671835308 | 60.3195 | 810.599 | Lipids and lipid-like molecules         | forward | 2.66012             | 3.40192 | 1.45329 | 0.04    |
| 69 | 2-acetyl-1-alkyl-sn-glycero-3-phosphocholine                                       | 0.669880923 | 194.44  | 524.372 | Lipids and lipid-like molecules         | forward | 0.10782             | 0.18153 | 1.68915 | 0.00795 |
| 70 | SM(d18:1/14:0)                                                                     | 0.666241769 | 179.31  | 675.544 | Lipids and lipid-like molecules         | forward | 0.01125             | 0.01949 | 1.84769 | 0.00454 |
| 71 | PC(P-18:1(11Z)/22:5(4Z,7Z,10Z,13Z,16Z))                                            | 0.663807538 | 59.04   | 818.605 | Lipids and lipid-like molecules         | forward | 0.04013             | 0.05366 | 1.67441 | 0.0148  |
| 72 | PC(22:2(13Z,16Z)/16:1(9Z))                                                         | 0.654881538 | 158.821 | 812.612 | Lipids and lipid-like molecules         | forward | 1.0271              | 1.34008 | 1.40268 | 0.02298 |

|     |                                                      |             |         |         |                                         |         |         |         |         |         |
|-----|------------------------------------------------------|-------------|---------|---------|-----------------------------------------|---------|---------|---------|---------|---------|
| 73  | SM(d17:1/24:1(15Z))                                  | 0.651156154 | 196.74  | 799.669 | Lipids and lipid-like molecules         | forward | 0.35193 | 0.40388 | 1.41819 | 0.0366  |
| 74  | PC(22:5(4Z,7Z,10Z,13Z,16Z)/P-18:0)                   | 0.649539308 | 59.1625 | 820.62  | Lipids and lipid-like molecules         | forward | 0.06017 | 0.0764  | 1.30051 | 0.04442 |
| 75  | PC(22:6(4Z,7Z,10Z,13Z,16Z,19Z)/18:1(11Z))            | 0.646523538 | 156.484 | 832.585 | Lipids and lipid-like molecules         | forward | 0.13102 | 0.17894 | 1.57262 | 0.00892 |
| 76  | Thiomorpholine 3-carboxylate                         | 0.642427154 | 210.493 | 148.043 | Organic acids and derivatives           | forward | 0.00736 | 0.01484 | 1.7268  | 0.00149 |
| 77  | PC(22:6(4Z,7Z,10Z,13Z,16Z,19Z)/20:1(11Z))            | 0.642385308 | 155.293 | 860.615 | Lipids and lipid-like molecules         | forward | 0.00911 | 0.01322 | 1.75428 | 0.0069  |
| 78  | LysoPC(22:0)                                         | 0.642016846 | 208.198 | 580.434 | Lipids and lipid-like molecules         | forward | 0.01084 | 0.01713 | 1.75549 | 0.01041 |
| 79  | PC(P-18:1(11Z)/22:6(4Z,7Z,10Z,13Z,16Z,19Z))          | 0.639919462 | 153.02  | 816.59  | Lipids and lipid-like molecules         | forward | 0.02114 | 0.03064 | 1.98013 | 0.00339 |
| 80  | PC(18:2(9Z,12Z)/15:0)                                | 0.639651154 | 166.756 | 744.554 | Lipids and lipid-like molecules         | forward | 0.12806 | 0.16216 | 1.4652  | 0.04019 |
| 81  | SM(d18:1/20:0)                                       | 0.625838308 | 199.026 | 759.636 | Lipids and lipid-like molecules         | forward | 0.36241 | 0.47956 | 1.9263  | 0.00596 |
| 82  | PC(16:1(9Z)/16:1(9Z))                                | 0.624318308 | 166.784 | 730.538 | Lipids and lipid-like molecules         | forward | 0.10825 | 0.1881  | 1.87568 | 0.00187 |
| 83  | PC(22:5(7Z,10Z,13Z,16Z,19Z)/20:4(5Z,8Z,11Z,14Z))     | 0.622864154 | 154.307 | 856.583 | Lipids and lipid-like molecules         | forward | 0.00975 | 0.01454 | 2.23042 | 5.4E-05 |
| 84  | PC(24:1(15Z)/18:4(6Z,9Z,12Z,15Z))                    | 0.621113923 | 156.44  | 864.647 | Lipids and lipid-like molecules         | forward | 0.00851 | 0.0135  | 1.71823 | 0.02252 |
| 85  | LysoPC(18:1(9Z))                                     | 0.620044615 | 195.524 | 522.356 | Lipids and lipid-like molecules         | forward | 0.02522 | 0.04176 | 1.58875 | 0.02586 |
| 86  | Montecristin                                         | 0.618816385 | 30.7299 | 575.503 | Lipids and lipid-like molecules         | forward | 0.01789 | 0.02267 | 1.43782 | 0.04612 |
| 87  | DG(15:0/18:3(6Z,9Z,12Z)/0:0)                         | 0.614711077 | 132.299 | 577.484 | Lipids and lipid-like molecules         | forward | 0.01418 | 0.02953 | 1.5064  | 0.04139 |
| 88  | PC(15:0/15:0)                                        | 0.608504231 | 52.3243 | 706.538 | Lipids and lipid-like molecules         | forward | 0.00589 | 0.01049 | 1.70965 | 0.01427 |
| 89  | PC(20:5(5Z,8Z,11Z,14Z,17Z)/P-18:1(11Z))              | 0.608295385 | 57.955  | 790.573 | Lipids and lipid-like molecules         | forward | 0.02288 | 0.03847 | 1.68433 | 0.01055 |
| 90  | 1-Phosphatidyl-1D-myo-inositol 3-phosphate           | 0.607852615 | 382.108 | 471.029 | Organic oxygen compounds                | forward | 0.05986 | 0.03205 | 2.33396 | 1.8E-05 |
| 91  | Homo-L-arginine                                      | 0.605033692 | 545.221 | 189.135 | Organic acids and derivatives           | forward | 0.09335 | 0.18296 | 1.61918 | 0.03949 |
| 92  | PC(18:1(11Z)/P-16:0)                                 | 0.597727846 | 106.254 | 744.59  | Lipids and lipid-like molecules         | forward | 0.06529 | 0.10019 | 1.34795 | 0.03204 |
| 93  | PC(20:4(8Z,11Z,14Z,17Z)/14:0)                        | 0.593391769 | 72.122  | 754.537 | Lipids and lipid-like molecules         | forward | 0.01299 | 0.02945 | 1.84688 | 0.00536 |
| 94  | PC(14:0/14:0)                                        | 0.584026231 | 170.22  | 678.506 | Lipids and lipid-like molecules         | forward | 0.0021  | 0.00592 | 1.78753 | 0.0032  |
| 95  | PC(22:6(4Z,7Z,10Z,13Z,16Z,19Z)/20:2(11Z,14Z))        | 0.565939308 | 155.293 | 858.6   | Lipids and lipid-like molecules         | forward | 0.00902 | 0.01389 | 2.41782 | 2E-05   |
| 96  | Se-Adenosylselenohomocysteine                        | 0.564319923 | 382.17  | 433.073 | Nucleosides, nucleotides, and analogues | forward | 0.01441 | 0.02373 | 2.18225 | 5.5E-05 |
| 97  | LysoPC(20:1(11Z))                                    | 0.562204    | 211.636 | 550.387 | Lipids and lipid-like molecules         | forward | 0.06954 | 0.08383 | 1.45803 | 0.02952 |
| 98  | Tryptophyl-Isololeucine                              | 0.555286923 | 199.052 | 318.181 | Organic acids and derivatives           | forward | 0.00208 | 0.00108 | 1.95715 | 0.00613 |
| 99  | PC(18:3(6Z,9Z,12Z)/P-18:1(11Z))                      | 0.540542077 | 155.375 | 766.574 | Lipids and lipid-like molecules         | forward | 0.4731  | 0.69658 | 1.56695 | 0.01194 |
| 100 | Glaucaurubin                                         | 0.526815308 | 226.476 | 479.229 | Lipids and lipid-like molecules         | forward | 0.00605 | 0.01283 | 1.43544 | 0.03408 |
| 101 | Taurine                                              | 0.518577385 | 309.12  | 126.022 | Organic acids and derivatives           | forward | 1.31077 | 0.78571 | 2.02203 | 0.00687 |
| 102 | N,N'-Diacylhydrazine                                 | 0.516998308 | 277.994 | 117.058 | Organic nitrogen compounds              | forward | 0.002   | 0.00338 | 2.17977 | 0.00033 |
| 103 | LysoPC(14:0/0:0)                                     | 0.516511923 | 222.831 | 468.309 | Lipids and lipid-like molecules         | forward | 0.30736 | 0.56297 | 1.95008 | 0.00187 |
| 104 | LysoPC(16:1(9Z)/0:0)                                 | 0.51328     | 217.95  | 494.325 | Lipids and lipid-like molecules         | forward | 0.42955 | 0.54605 | 1.39463 | 0.03521 |
| 105 | S-Allylcysteine                                      | 0.509605692 | 258.652 | 162.058 | Organic acids and derivatives           | forward | 0.00166 | 0.00974 | 1.49039 | 0.03397 |
| 106 | Naphthalene epoxide                                  | 0.468554462 | 309.102 | 143.049 | Benzenoids                              | forward | 0.00619 | 0.00285 | 1.88189 | 0.00917 |
| 107 | PE(P-18:1(9Z)/20:4(5Z,8Z,11Z,14Z))                   | 0.465040615 | 36.4796 | 750.543 | Lipids and lipid-like molecules         | forward | 0.0179  | 0.0288  | 1.9314  | 0.00092 |
| 108 | Octadecanamide                                       | 0.453031231 | 133.528 | 284.295 | Lipids and lipid-like molecules         | forward | 0.00186 | 0.00289 | 1.42946 | 0.02928 |
| 109 | PC(P-16:0/18:4(6Z,9Z,12Z,15Z))                       | 0.449280462 | 156.47  | 738.543 | Lipids and lipid-like molecules         | forward | 0.00743 | 0.01471 | 1.65718 | 0.01346 |
| 110 | (R)-2-Nitro-p-mentha-1,5-diene                       | 0.433818077 | 73.4438 | 182.118 | Lipids and lipid-like molecules         | forward | 0.00032 | 0.00016 | 1.14507 | 0.04629 |
| 111 | PE(20:4(8Z,11Z,14Z,17Z)/P-18:0)                      | 0.433495769 | 37.514  | 752.559 | Lipids and lipid-like molecules         | forward | 0.02178 | 0.0441  | 2.14478 | 0.00012 |
| 112 | PE(P-18:1(9Z)/20:3(5Z,8Z,11Z))                       | 0.412595615 | 155.362 | 752.558 | Lipids and lipid-like molecules         | forward | 0.16155 | 0.32508 | 2.18953 | 0.0001  |
| 113 | PE(P-18:1(11Z)/22:4(7Z,10Z,13Z,16Z))                 | 0.398357308 | 154.294 | 778.575 | Lipids and lipid-like molecules         | forward | 0.02652 | 0.04742 | 2.25541 | 9.6E-05 |
| 114 | 3beta,15alpha-Diacetoxylanosta-8,24-dien-26-oic acid | 0.385740538 | 25.0384 | 557.384 | Lipids and lipid-like molecules         | forward | 0.00041 | 0.0009  | 1.64781 | 0.01701 |
| 115 | PE(P-16:0/20:4(5Z,8Z,11Z,14Z))                       | 0.381521077 | 37.555  | 724.527 | Lipids and lipid-like molecules         | forward | 0.0167  | 0.03225 | 2.12136 | 5.2E-05 |
| 116 | PE(P-18:1(11Z)/22:5(4Z,7Z,10Z,13Z,16Z))              | 0.359927308 | 154.208 | 776.558 | Lipids and lipid-like molecules         | forward | 0.06231 | 0.09781 | 1.97713 | 0.00095 |
| 117 | PE(P-18:1(9Z)/18:1(9Z))                              | 0.356409538 | 37.5808 | 728.559 | Lipids and lipid-like molecules         | forward | 0.00609 | 0.01019 | 1.20965 | 0.0427  |
| 118 | PE(18:3(9Z,12Z,15Z)/P-18:1(11Z))                     | 0.331204615 | 158.498 | 724.527 | Lipids and lipid-like molecules         | forward | 0.0795  | 0.15351 | 2.23567 | 3.8E-05 |
| 119 | PE(P-18:1(9Z)/16:1(9Z))                              | 0.329981769 | 37.6382 | 700.527 | Lipids and lipid-like molecules         | forward | 0.0044  | 0.00921 | 1.30664 | 0.00167 |
| 120 | Vitamin A                                            | 0.302557769 | 30.8044 | 269.226 | Lipids and lipid-like molecules         | reverse | 0.00258 | 0.00364 | 2.00985 | 0.00082 |

MS/MS score: the matching score of mass spectrometry secondary ion, ranged from 0 to 1, and the greater the value, the better; Compounds category: classification information of the substance in HMDB database. Mean AS: the mean of the relative quantitative value of the AS group; Mean HC: the mean of the relative quantitative value of the HC group;
