# Supplementary material for: Serum metabolomics reveals the metabolic profile and potential biomarkers of ankylosing spondylitis
Source: Royal Society of Chemistry journal article supplement (doi:10.1039/d4mo00076e), 2024-06-24
Supplement: d4mo00076e8.pdf [file d4mo00076e8.pdf]

| ID | Name                                                          | MS/MS score | rt       | mz        | Compounds category              | Type    | Mean AS   | Mean HC   | VIP       | P-VALUE   |
|----|---------------------------------------------------------------|-------------|----------|-----------|---------------------------------|---------|-----------|-----------|-----------|-----------|
| 1  | Pyruvic acid                                                  | 1           | 263.251  | 87.007985 | Organic acids and derivatives   | forward | 0.4964835 | 0.3976837 | 1.5015746 | 0.0266629 |
| 2  | Arachidonic acid                                              | 0.999514692 | 37.1885  | 303.23283 | Lipids and lipid-like molecules | forward | 2.2713397 | 1.2983446 | 1.6866259 | 0.0195981 |
| 3  | Palmitoleic acid                                              | 0.998543231 | 219.253  | 253.21731 | Lipids and lipid-like molecules | forward | 0.0163886 | 0.019342  | 1.2420709 | 0.0410038 |
| 4  | Sarcosine                                                     | 0.998314538 | 360.156  | 88.03959  | Organic acids and derivatives   | forward | 3.4072859 | 4.6260202 | 1.916151  | 0.0021853 |
| 5  | 2,3-Dihydroxybutanedioic acid                                 | 0.995710692 | 29.4325  | 149.00895 | Organic oxygen compounds        | forward | 0.2428708 | 0.1054949 | 1.4868143 | 0.0210582 |
| 6  | Uracil                                                        | 0.994870385 | 76.9874  | 111.01926 | Organoheterocyclic compound:    | forward | 1.4529017 | 0.46398   | 1.7039198 | 0.0244329 |
| 7  | 3-Methyl-2-oxovaleric acid                                    | 0.994417615 | 36.9034  | 129.05505 | Organic acids and derivatives   | forward | 32.500428 | 52.298007 | 1.8263996 | 0.0005791 |
| 8  | Adenine                                                       | 0.993215923 | 360.166  | 134.04658 | Organoheterocyclic compound:    | forward | 0.0597767 | 0.0808426 | 1.2970383 | 0.0304981 |
| 9  | Hypotaurine                                                   | 0.990013615 | 358.412  | 108.01171 | Organic acids and derivatives   | forward | 0.0226704 | 0.0140825 | 1.4919383 | 0.0163634 |
| 10 | Succinic acid                                                 | 0.984536385 | 386.328  | 117.01865 | Organic acids and derivatives   | forward | 1.0746449 | 0.4273974 | 2.3093178 | 0.0025666 |
| 11 | Malonic acid                                                  | 0.981726    | 383.9475 | 103.00291 | Organic acids and derivatives   | forward | 0.1000195 | 0.0643635 | 1.5388486 | 0.012673  |
| 12 | L-Tyrosine                                                    | 0.981300231 | 317.02   | 180.0663  | Organic acids and derivatives   | forward | 1.0305774 | 1.4138511 | 1.7297651 | 0.0089244 |
| 13 | Ribothymidine                                                 | 0.976884769 | 141.517  | 257.07798 | eosides, nucleotides, and analc | forward | 0.1044171 | 0.1379744 | 1.3217103 | 0.0366946 |
| 14 | Ornithine                                                     | 0.975128538 | 541.6245 | 131.08197 | Organic acids and derivatives   | forward | 0.097607  | 0.1846554 | 1.7507919 | 0.001741  |
| 15 | beta-Alanine                                                  | 0.974484077 | 92.7821  | 88.039583 | Organic acids and derivatives   | forward | 0.0688756 | 0.0544084 | 1.5901649 | 0.0123815 |
| 16 | Fructose-1P                                                   | 0.974130846 | 305.503  | 179.05579 | Organooxygen compounds          | forward | 0.5671573 | 1.2007984 | 1.6499908 | 0.0042973 |
| 17 | Hippuric acid                                                 | 0.951013769 | 200.821  | 178.05059 | Benzenoids                      | forward | 1.2322435 | 4.0157031 | 1.2570812 | 0.0162789 |
| 18 | Saccharin                                                     | 0.949431231 | 30.7839  | 181.99142 | Organoheterocyclic compound:    | forward | 0.0190364 | 0.1377038 | 1.4261756 | 0.0332015 |
| 19 | Uric acid                                                     | 0.949214231 | 336.2105 | 167.02072 | Organoheterocyclic compound:    | forward | 2.4357743 | 3.9287673 | 1.602456  | 0.0162106 |
| 20 | Succinic acid semialdehyde                                    | 0.947223846 | 383.939  | 101.02365 | Lipids and lipid-like molecules | forward | 0.5407703 | 0.8830932 | 1.7990634 | 0.0046334 |
| 21 | Hydroxyphenyllactic acid                                      | 0.946628462 | 196.351  | 181.05026 | henylpropanoids and polyketid   | forward | 0.5188106 | 0.7881247 | 1.7601587 | 0.0252262 |
| 22 | Inosine                                                       | 0.921620846 | 228.4175 | 267.0734  | eosides, nucleotides, and analc | forward | 0.1157045 | 0.0203505 | 2.099981  | 0.0149245 |
| 23 | Isobutyrylglycine                                             | 0.920435692 | 190.425  | 144.06605 | Organic acids and derivatives   | forward | 0.0229551 | 0.0281159 | 1.9381591 | 0.0002277 |
| 24 | N2-gamma-Glutamylglutamine                                    | 0.919386462 | 435.689  | 274.10447 | Organic acids and derivatives   | forward | 0.0149063 | 0.0248137 | 2.1684715 | 7.796E-05 |
| 25 | Cyclohexanecarboxylic acid                                    | 0.908517308 | 335.055  | 127.07583 | Organic acids and derivatives   | forward | 0.1323552 | 0.1654296 | 1.3863015 | 0.0212611 |
| 26 | (A±)-Tryptophan                                               | 0.849128077 | 278.511  | 203.08244 | Organoheterocyclic compound:    | forward | 1.471793  | 2.1698128 | 1.8989526 | 0.0008727 |
| 27 | 3-Sulfinato-L-alaninate                                       | 0.847247692 | 192.702  | 152.00184 | Organic acids and derivatives   | forward | 0.1888249 | 0.0859926 | 1.378179  | 0.0425124 |
| 28 | Pyrocatechol                                                  | 0.833373    | 23.1999  | 109.02871 | Benzenoids                      | forward | 0.283076  | 0.5052753 | 1.5037116 | 0.0311783 |
| 29 | D-Glucose                                                     | 0.827613    | 226.128  | 179.05574 | Organic oxygen compounds        | forward | 0.3734874 | 0.2672972 | 1.8183785 | 0.0036161 |
| 30 | 3-(3,4-Dihydroxy-5-methoxy)-2-propenoic acid                  | 0.819305538 | 186.735  | 209.04546 | henylpropanoids and polyketid   | forward | 0.0043669 | 0.0114    | 2.3513548 | 0.0039222 |
| 31 | 9,10-DHOME                                                    | 0.813848462 | 47.13315 | 313.2386  | Lipids and lipid-like molecules | forward | 0.0228633 | 0.0516034 | 1.5954824 | 0.0338513 |
| 32 | Ortho-Hydroxyphenylacetic acid                                | 0.807277615 | 109.704  | 151.03956 | Benzenoids                      | forward | 0.1052897 | 0.0480129 | 1.3314575 | 0.0340108 |
| 33 | L-Arginine                                                    | 0.794383923 | 540.15   | 173.10404 | Organic acids and derivatives   | forward | 0.0579283 | 0.1380524 | 1.8606759 | 0.0040376 |
| 34 | Threonic acid                                                 | 0.765045308 | 315.4975 | 135.02927 | Organic oxygen compounds        | forward | 1.5213819 | 2.5476821 | 1.9054993 | 0.016007  |
| 35 | Hypoxanthine                                                  | 0.751278    | 174.292  | 135.03064 | Organoheterocyclic compound:    | forward | 79.425346 | 13.536912 | 2.4444044 | 5.755E-05 |
| 36 | 5-Hydroxyindoleacetic acid                                    | 0.724059231 | 279.668  | 190.05073 | Organoheterocyclic compound:    | forward | 0.0121537 | 0.0173944 | 1.5862104 | 0.0148341 |
| 37 | Dodecanoylcarnitine                                           | 0.703063231 | 116.9015 | 342.26526 | Lipids and lipid-like molecules | forward | 0.0071994 | 0.0109164 | 1.1235083 | 0.0175325 |
| 38 | 3,7-Dimethyluric acid                                         | 0.661591385 | 376.7305 | 195.05074 | Organoheterocyclic compound:    | forward | 0.1168259 | 0.2484489 | 1.985594  | 0.013965  |
| 39 | N-Acetylarlyamine                                             | 0.660557308 | 200.862  | 134.06051 | Benzenoids                      | forward | 0.0835808 | 0.2961486 | 1.3002673 | 0.0143874 |
| 40 | LysoPA(16:0/0:0)                                              | 0.642509692 | 216.959  | 409.23642 | Lipids and lipid-like molecules | forward | 0.0422554 | 0.046803  | 1.2173097 | 0.0323116 |
| 41 | Urocanic acid                                                 | 0.627231538 | 315.339  | 137.03354 | Organoheterocyclic compound:    | forward | 0.0107158 | 0.0188373 | 1.8224233 | 0.0303064 |
| 42 | Oxypurinol                                                    | 0.608082538 | 175.365  | 151.02813 | Organoheterocyclic compound:    | forward | 0.0052328 | 0.0119709 | 1.4467091 | 0.0005648 |
| 43 | 2-acetyl-1-alkyl-sn-glycero-3-phosphocholine                  | 0.586633615 | 213.543  | 522.35694 | Lipids and lipid-like molecules | forward | 0.0042206 | 0.0055947 | 1.5152164 | 0.0099944 |
| 44 | Ketoleucine                                                   | 0.585551308 | 193.995  | 129.05508 | Organic acids and derivatives   | forward | 0.1203969 | 0.1655583 | 1.7217763 | 0.0020907 |
| 45 | 3-Hydroxymethylglutaric acid                                  | 0.581000231 | 312.001  | 161.04507 | Lipids and lipid-like molecules | forward | 0.2361017 | 0.4630237 | 1.8523282 | 0.0041442 |
| 46 | LysoPA(18:1(9Z)/0:0)                                          | 0.575933308 | 216.962  | 435.25186 | Lipids and lipid-like molecules | forward | 0.0221406 | 0.025637  | 1.3574015 | 0.0169277 |
| 47 | PE(16:0/18:2(9Z,12Z))                                         | 0.551462769 | 168.499  | 714.51039 | Lipids and lipid-like molecules | forward | 0.0639485 | 0.1094615 | 1.5996358 | 0.0221944 |
| 48 | fluvoxamino acid                                              | 0.531381231 | 185.9095 | 317.11453 | Benzenoids                      | forward | 0.0104571 | 0.0188804 | 1.5531146 | 0.0101102 |
| 49 | 4-hydroxy-3-[1-(4-hydroxyphenyl)-3-oxobutyl]-2H-chromen-2-one | 0.512957769 | 185.886  | 323.09002 | henylpropanoids and polyketid   | forward | 0.0020025 | 0.0029115 | 1.6783982 | 0.0026141 |
| 50 | Dihydrolipoate                                                | 0.482846846 | 65.3539  | 207.05077 | Lipids and lipid-like molecules | forward | 0.0202666 | 0.0307198 | 1.3100486 | 0.0361652 |

MS/MS score: the matching score of mass spectrometry secondary ion, ranged from 0 to 1, and the greater the value, the better; Compounds category:classification information of the substance in HMDB database. Mean AS: the mean of the relative quantitative value of the AS group; Mean HC: the mean of the relative quantitative value of the HC group.
