# Supplementary figures and images for: Serum metabolomics reveals the metabolic profile and potential biomarkers of ankylosing spondylitis
Source: Royal Society of Chemistry journal article supplement (doi:10.1039/d4mo00076e), 2024-06-24

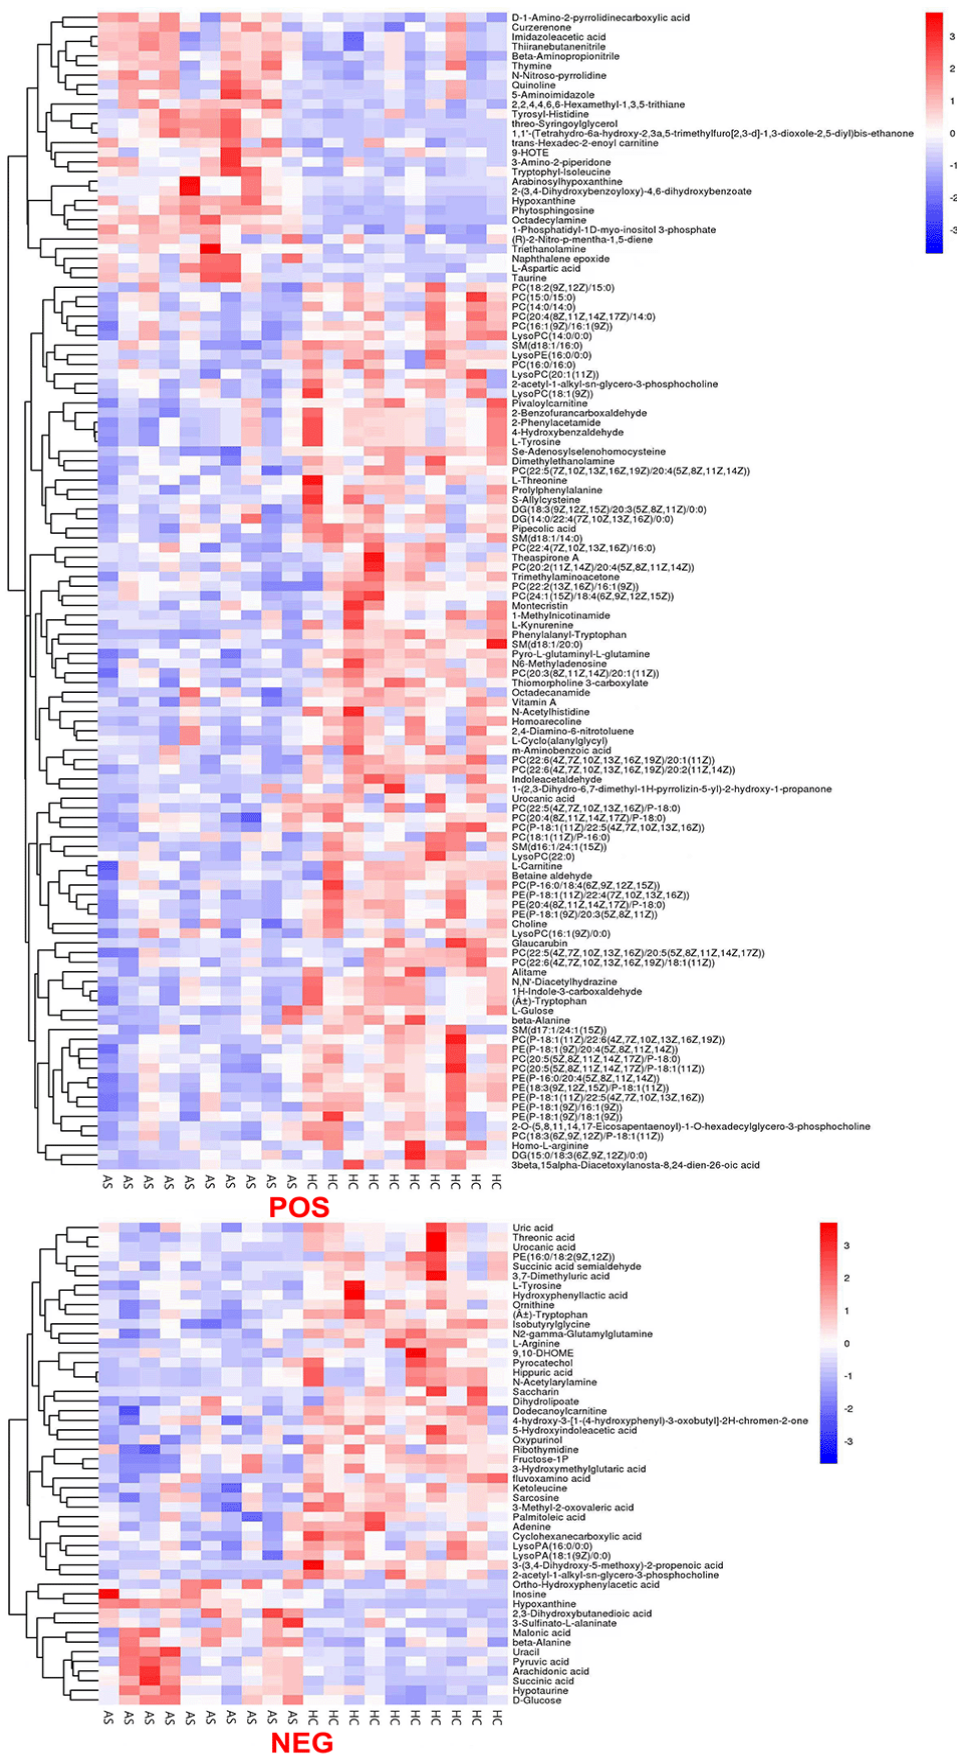

Supplementary Fig. S2: Heatmap of hierarchical clustering analysis of group AS vs HC.

Supplement: d4mo00076e2.pdf [file d4mo00076e2.pdf]
